# Supplementary material
Source: publisher site journal article supplement (https://www.spandidos-publications.com/3128/downloadSupplementary)
Supplement: Supplementary file 1 [file downloadSupplementary]

## Sheet: Sheet1
Table SIX. Kyoto Encyclopedia of Genes and Genomes analysis of the potential targets of differentially expressed long non-coding RNAs regulated in a trans regulatory manner.
Category	Term	Count	%	P-value	Genes	List Total	Pop Hits	Pop Total	Fold Enrichment	Bonferroni	Benjamini	False discovery rate
KEGG_PATHWAY	rno00600:Sphingolipid metabolism	7	1.01892	0.00491816	ACER3, SGPP2, ACER2, B4GALT6, NEU3, ASAH1, NEU4	254	49	7749	4.35827	0.689161	0.689161	6.15361
KEGG_PATHWAY	rno05152:Tuberculosis	13	1.89229	0.0158743	IRAK4, BID, LAMP1, FCGR2B, MAPK13, CAMK2G, ITGB2, MALT1, APAF1, KSR1, RT1-DOA, IFNGR2, CD14	254	182	7749	2.17913	0.977458	0.849861	18.6272
KEGG_PATHWAY	rno01130:Biosynthesis of antibiotics	14	2.03785	0.0269494	PYCRL, ACO2, ADPGK, EHHADH, AK3, IDNK, PFAS, NME5, GALM, PGLS, PKLR, GGPS1, ADSL, ALDH9A1	254	219	7749	1.95028	0.998458	0.884469	29.6663
KEGG_PATHWAY	rno05416:Viral myocarditis	8	1.16448	0.0273184	BID, CD80, ITGB2, RT1-S3, RT1-DOA, RT1-T24-1, RT1-T24-4, RT1-T24-3	254	90	7749	2.71181	0.998591	0.806241	30.0092
KEGG_PATHWAY	rno04020:Calcium signaling pathway	12	1.74672	0.0395867	P2RX5, ORAI2, GNA15, ATP2A2, CAMK2G, RYR1, MYLK2, NOS3, HTR2B, HTR5B, F2R, ORAI3	254	185	7749	1.97889	0.99993	0.852593	40.5666
KEGG_PATHWAY	rno04146:Peroxisome	7	1.01892	0.0587755	HACL1, PEX11B, EHHADH, ABCD2, PEX6, ABCD4, PHYH	254	85	7749	2.51241	0.999999	0.908614	54.1729
KEGG_PATHWAY	rno00380:Tryptophan metabolism	5	0.727802	0.062174	DDC, EHHADH, AOX4, ALDH9A1, AFMID	254	46	7749	3.31607	1	0.886201	56.2593
KEGG_PATHWAY	rno05332:Graft-versus-host disease	6	0.873362	0.0636902	CD80, RT1-S3, RT1-DOA, RT1-T24-1, RT1-T24-4, RT1-T24-3	254	66	7749	2.77344	1	0.857667	57.1616
KEGG_PATHWAY	rno05330:Allograft rejection	6	0.873362	0.0778506	CD80, RT1-S3, RT1-DOA, RT1-T24-1, RT1-T24-4, RT1-T24-3	254	70	7749	2.61496	1	0.881669	64.7971
KEGG_PATHWAY	rno05145:Toxoplasmosis	8	1.16448	0.081778	IRAK4, LAMA1, CCR5, MAPK13, IRGM, RT1-DOA, IFNGR2, BIRC2	254	115	7749	2.12229	1	0.867608	66.6803
KEGG_PATHWAY	rno05140:Leishmaniasis	6	0.873362	0.0855163	IRAK4, MAPK13, NCF1, ITGB2, RT1-DOA, IFNGR2	254	72	7749	2.54232	1	0.85428	68.3861
KEGG_PATHWAY	rno05166:HTLV-I infection	15	2.18341	0.09116	CRTC3, ANAPC1, ITGB2, CHEK2, ANAPC11, RT1-S3, RT1-DOA, FZD6, WNT4, ATF3, ELK4, NFATC4, RT1-T24-1, RT1-T24-4, RT1-T24-3	254	289	7749	1.58345	1	0.8486	70.8093
KEGG_PATHWAY	rno04612:Antigen processing and presentation	7	1.01892	0.0969564	PSME2, TAP1, RT1-S3, RT1-DOA, RT1-T24-1, RT1-T24-4, RT1-T24-3	254	97	7749	2.2016	1	0.844211	73.1187
KEGG_PATHWAY	rno01100:Metabolic pathways	51	7.42358	0.0991965	ETNPPL, NT5C3A, EHHADH, ACOT2, ASAH1, AFMID, TPK1, PRIM1, PIGH, NOS3, NT5E, DDC, ACO2, PIK3C2B, PNPLA3, NME5, COQ2, PGLS, PKLR, ADSL, ALDH9A1, GATC, AOC3, PYCRL, GALNT7, HSD17B1, ADPGK, HSD3B7, LOC100362350, ADH6, PFAS, GALM, STT3A, CSAD, GALNS, GGPS1, PNPO, PCYT1B, B4GALT6, PTS, LIPT1, AGL, POLR3F, ACER2, IDNK, MMAB, CYP2C6V1, DHFR, DNMT1, AOX4, PHYKPL	254	1285	7749	1.21082	1	0.829411	73.9652
